# Supplementary material for: Ectopic Overexpression of a Novel R2R3-MYB, NtMYB2 from Chinese Narcissus Represses Anthocyanin Biosynthesis in Tobacco
Source: PubMed Central journal article supplement (PMC6017421; doi:10.3390/molecules23040781), 2018-03-28
Supplement: molecules-23-00781-s001.pdf [file molecules-23-00781-s001.pdf]

**Figure S 1.** Confirmation of transgenic tobacco plants. Over expression *NtMYB2* lines (L-26, L33, and L41); WT, wild type. M represents for marker.

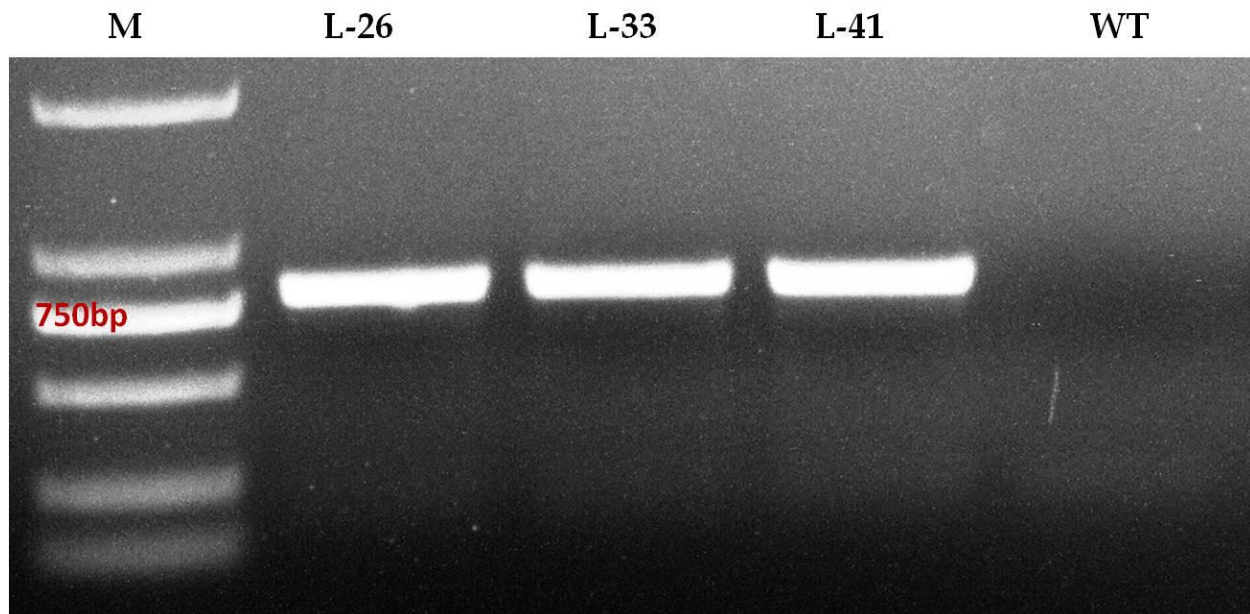

Table supplementary 1

Primers for real-time PCR analysis of tobacco genes of flavonoid biosynthesis pathway

| Genes          | GenBank ID | Forward primer (5' to 3') | Reverse primer (5' to 3') |
|----------------|------------|---------------------------|---------------------------|
| <i>NtCHS</i>   | AF311783   | TTGTTCGAGCTTGTCTCTGC      | AGCCCAGGAACATCTTTGAG      |
| <i>NtCHI</i>   | AB213651   | GTCAGGCCATTGAAAAGCTC      | CTAATCGTCAATGCCCAAC       |
| <i>NtF3H</i>   | AB289450   | CAAGGCATGTGTGGATATGG      | TGTGTCGTTTTAGTCCAAGG      |
| <i>NtFLS</i>   | AB289451   | GTCCACAACGTTGCATGGTG      | CACAACCTTCTCGCAGCCTC      |
| <i>NtDFR</i>   | EF421429   | AACCAACAGTCAGGGGAATG      | TTGGACATCGACAGTTCCAG      |
| <i>NtPAL</i>   | X78269     | ATTGAGGTCATCCGTTCTGC      | TCTGCAGCTCTTTCTGCATC      |
| <i>NtLAR</i>   | AM827419   | TCAAGGTCCTTTACGCCATC      | ACGAACCTGCTTCTCTTTGG      |
| <i>NtANR1</i>  | AM791704   | CATTTGACTTTCCCAAACGC      | ATTGGGCTTTTGGAGTTGTGC     |
| <i>NtUFGT</i>  | FG627024   | GAGTGCATTGGATGCCTTTT      | CCAGCTCCATTAGGTCCTTG      |
| <i>NtActin</i> | AY179605   | AATGATCGGAATGGAAGCTG      | TGGTACCACTGAGGACA         |
| <i>NtPAL</i>   | X78269     | ATTGAGGTCATCCGTTCTGC      | TCTGCAGCTCTTTCTGCATC      |
| <i>NtANS</i>   | AB289447   | TGGCGTTGAAGCTCATACTG      | GGAATTAGGCACACACTTTGC     |
| <i>Nt4CL</i>   | U50845     | TCATTGACGAGGATGACGAG      | TGGGATGGTTGAGAAGAAGG      |
